# Supplementary material
Source: publisher figshare collection journal article supplement (https://diabetesjournals.figshare.com/ndownloader/files/34021304)
Supplement: Supplementary file 1 [file 34021304]

## Supplemental Material

|                                                                                                                                                                                                             |    |
|-------------------------------------------------------------------------------------------------------------------------------------------------------------------------------------------------------------|----|
| Supplementary Table S1. Measurements and definitions for health examination data .....                                                                                                                      | 2  |
| Supplementary Table S2. ICD-10 code for pancreatic disease .....                                                                                                                                            | 4  |
| Supplementary Table S3. ICD-10 code for diabetic complications .....                                                                                                                                        | 6  |
| Supplementary Table S4. ICD-10 code for Charlson comorbidity index .....                                                                                                                                    | 11 |
| Supplementary Table S5. Hazard ratios of insulin use in DEP .....                                                                                                                                           | 12 |
| Supplementary Table S6. Baseline characteristics of DEP subtypes .....                                                                                                                                      | 13 |
| Supplementary Table S7. Relative odds for diabetic complications and all-cause mortality by DEP subtypes compared to type 2 diabetes .....                                                                  | 15 |
| Supplementary Table S8. Relative odds for all-cause mortality in DEP compared to cardiovascular or renal disease-matched type 2 diabetes .....                                                              | 17 |
| Supplementary Table S9. Sensitivity analysis for diabetic complications and all-cause mortality among insulin first users in DEP compared to type 2 diabetes .....                                          | 18 |
| Supplementary Figure S1. Flowchart of patient selection .....                                                                                                                                               | 19 |
| Supplementary Figure S2. Sensitivity analysis for insulin use at each time point between DEP and type 2 diabetes excluding patients who initiated insulin within 6 months since diagnosis of diabetes ..... | 20 |
| Supplementary Figure S3. Subgroup analysis of HRs for diabetic complications and all-cause mortality of DEP compared to type 2 diabetes by insulin regimen .....                                            | 21 |

**Supplementary Table S1. Measurements and definitions for health examination data**

| Measurement parameters       | Definitions                                                                                                                                                                                                                                                                                                                                                                                                                                                                                                                                                                                                                                                                                                                   |
|------------------------------|-------------------------------------------------------------------------------------------------------------------------------------------------------------------------------------------------------------------------------------------------------------------------------------------------------------------------------------------------------------------------------------------------------------------------------------------------------------------------------------------------------------------------------------------------------------------------------------------------------------------------------------------------------------------------------------------------------------------------------|
| Medical coverage             | <ul style="list-style-type: none"> <li>• The inequality index used the quintiles of property and annual income provided by Korean medical insurance.</li> </ul>                                                                                                                                                                                                                                                                                                                                                                                                                                                                                                                                                               |
| Anthropometric measurements  | <ul style="list-style-type: none"> <li>• Standing height and weight were measured, and BMI was calculated by dividing the weight (kg) by the square of the height (m).</li> </ul>                                                                                                                                                                                                                                                                                                                                                                                                                                                                                                                                             |
| Blood pressure               | <ul style="list-style-type: none"> <li>• Resting systolic and diastolic blood pressures were measured twice in a sitting position.</li> </ul>                                                                                                                                                                                                                                                                                                                                                                                                                                                                                                                                                                                 |
| Laboratory test              | <ul style="list-style-type: none"> <li>• FPG, Lipid panel, and serum creatinine were analyzed using blood samples after overnight fasting.</li> <li>• eGFR was calculated using CKD-EPI (Chronic Kidney Disease Epidemiology Collaboration) equation; <math>eGFR = 141 \times \min(SCr/\kappa, 1)^\alpha \times \max(SCr/\kappa, 1)^{-1.209} \times 0.993^{Age} \times 1.018</math> [if female] <math>\times 1.159</math> [if Black]. SCr is serum creatinine, <math>\kappa</math> is 0.7 for females and 0.9 for males, <math>\alpha</math> is -0.329 for females and -0.411 for males, min indicates the minimum of SCr/<math>\kappa</math> or 1, and max indicates the maximum of SCr/<math>\kappa</math> or 1.</li> </ul> |
| Self-reported questionnaires | <ul style="list-style-type: none"> <li>• Smoking and alcohol consumption status were obtained through self-reported questionnaires.</li> <li>• Smoking was classified into three categories: never smoked, former smoked, and currently smoked.</li> <li>• Alcohol was dichotomized into non-drinkers and current drinkers. Then, current drinkers were divided into two groups: less than or more than 14units per week, as defined by the NIAAA as the maximum drinking limit for moderate drinking.</li> </ul>                                                                                                                                                                                                             |

All health examinations are performed after overnight fasting, and the Korean Association of Laboratory Quality Control supervises the quality control procedures. Lipid panel includes total cholesterol, triglyceride, HDL-cholesterol, and LDL-cholesterol. BMI=body mass index. FPG=fasting plasma glucose. eGFR=estimated glomerular filtration rate. SCr=serum creatinine. HDL=high-density lipoprotein. LDL =low-density lipoprotein.

NIAAA=National Institute on Alcohol Abuse and Alcoholism.

**Supplementary Table S2. ICD-10 code for pancreatic disease**

| ICD code                          | Description                                          |
|-----------------------------------|------------------------------------------------------|
| <b>Acute pancreatic disease</b>   |                                                      |
| K85                               | Acute pancreatitis                                   |
| K85.0                             | Idiopathic acute pancreatitis                        |
| K85.1                             | Biliary acute pancreatitis                           |
| K85.2                             | Alcohol-induced acute pancreatitis                   |
| K85.3                             | Drug-induced acute pancreatitis                      |
| K85.8                             | Other acute pancreatitis                             |
| K85.9                             | Acute pancreatitis, unspecified                      |
| <b>Chronic pancreatic disease</b> |                                                      |
| K86                               | Other diseases of pancreas                           |
| K86.0                             | Alcohol-induced chronic pancreatitis                 |
| K86.1                             | Other chronic pancreatitis                           |
| K86.2                             | Cyst of pancreas                                     |
| K86.3                             | Pseudocyst of pancreas                               |
| K86.8                             | Other specified diseases of pancreas                 |
| K86.9                             | Disease of pancreas, unspecified                     |
| <b>Pancreatic cancer</b>          |                                                      |
| C25                               | Malignant neoplasm of pancreas                       |
| C25.0                             | Malignant neoplasm of head of pancreas               |
| C25.1                             | Malignant neoplasm of body of pancreas               |
| C25.2                             | Malignant neoplasm of tail of pancreas               |
| C25.3                             | Malignant neoplasm of pancreatic duct                |
| C25.4                             | Malignant neoplasm of endocrine pancreas             |
| C25.7                             | Malignant neoplasm of other parts of pancreas        |
| C25.8                             | Malignant neoplasm of overlapping lesion of pancreas |
| C25.9                             | Malignant neoplasm of pancreas, unspecified          |

**Cystic fibrosis**

|       |                                               |
|-------|-----------------------------------------------|
| E84   | Cystic fibrosis (Mucoviscidosis)              |
| E84.0 | Cystic fibrosis with pulmonary manifestations |
| E84.8 | Cystic fibrosis with other manifestations     |
| E84.9 | Cystic fibrosis, unspecified                  |

---

**Supplementary Table S3. ICD-10 code for diabetic complications**

| <b>ICD code</b>                         | <b>Disease description</b>                                                                 |
|-----------------------------------------|--------------------------------------------------------------------------------------------|
| <b>Acute diabetic complication</b>      |                                                                                            |
| <b>Hypoglycemia</b>                     |                                                                                            |
| E11.08                                  | Type 2 diabetes mellitus, with diabetic hypoglycemic coma                                  |
| E11.63                                  | Type 2 diabetes mellitus, with hypoglycemia                                                |
| E12.08                                  | Malnutrition-related diabetes mellitus, with diabetic hypoglycemic coma                    |
| E12.63                                  | Malnutrition-related diabetes mellitus, with hypoglycemia                                  |
| E13.08                                  | Other unspecified diabetes mellitus, with diabetic hypoglycemic coma                       |
| E13.63                                  | Other specified diabetes mellitus, with hypoglycemia                                       |
| E14.08                                  | Unspecified diabetic mellitus, with diabetic hypoglycemic coma                             |
| E14.63                                  | Unspecified diabetes mellitus, with hypoglycemia                                           |
| E16.2                                   | Hypoglycemia, unspecified                                                                  |
| <b>Hyperosmolar hyperglycemic state</b> |                                                                                            |
| E11.00                                  | Type 2 diabetes mellitus, with coma, with hyperosmolarity                                  |
| E12.00                                  | Malnutrition-related diabetes mellitus, with coma, with hyperosmolarity                    |
| E13.00                                  | Other specified diabetes mellitus, with coma, with hyperosmolarity                         |
| E14.00                                  | Unspecified diabetes mellitus, with coma, with hyperosmolarity                             |
| <b>Diabetic ketoacidosis</b>            |                                                                                            |
| E11.01                                  | Type 2 diabetes mellitus, with coma, with ketoacidosis                                     |
| E11.03                                  | Type 2 diabetes mellitus , with coma, with ketoacidosis, with lactic acidosis              |
| E11.10                                  | Type 2 diabetes mellitus, with ketoacidosis                                                |
| E11.12                                  | Type 2 diabetes mellitus, with ketoacidosis, with lactic acidosis                          |
| E12.01                                  | Malnutrition-related diabetes mellitus, with coma, with ketoacidosis                       |
| E12.03                                  | Malnutrition-related diabetes mellitus, with coma, with ketoacidosis, with lactic acidosis |
| E12.10                                  | Malnutrition-related diabetes mellitus, with ketoacidosis                                  |
| E12.12                                  | Malnutrition-related diabetes mellitus, with ketoacidosis, with lactic acidosis            |
| E13.01                                  | Other specified diabetes mellitus, with coma, with ketoacidosis                            |

|        |                                                                                       |
|--------|---------------------------------------------------------------------------------------|
| E13.03 | Other specified diabetes mellitus, with coma, with ketoacidosis, with lactic acidosis |
| E13.10 | Other specified diabetes mellitus, with ketoacidosis                                  |
| E13.12 | Other specified diabetes mellitus, with ketoacidosis, with lactic acidosis            |
| E14.01 | Unspecified diabetes mellitus, with coma, with ketoacidosis                           |
| E14.03 | Unspecified diabetes mellitus, with coma, with ketoacidosis, with lactic acidosis     |
| E14.10 | Unspecified diabetes mellitus, with ketoacidosis                                      |
| E14.12 | Unspecified diabetes mellitus, with ketoacidosis, with lactic acidosis                |

### **Chronic diabetic complication**

#### **Diabetic neuropathy**

|       |                                                                         |
|-------|-------------------------------------------------------------------------|
| E11.4 | Type 2 diabetes mellitus, with neurological complications               |
| E12.4 | Malnutrition-related diabetes mellitus, with neurological complications |
| E13.4 | Other specified diabetes mellitus, with neurological complications      |
| E14.4 | Unspecified diabetes mellitus, with neurological complications          |
| G99.0 | Diabetic autonomic neuropathy                                           |
| G59.0 | Diabetic mononeuropathy                                                 |
| G63.2 | Diabetic polyneuropathy                                                 |

#### **Diabetic nephropathy**

|       |                                                                  |
|-------|------------------------------------------------------------------|
| E11.2 | Type 2 diabetes mellitus, with renal complications               |
| E12.2 | Malnutrition-related diabetes mellitus, with renal complications |
| E13.2 | Other specified diabetes mellitus, with renal complications      |
| E14.2 | Unspecified diabetes mellitus, with renal complications          |
| N08.3 | Diabetic nephropathy                                             |
| N18   | Chronic kidney diseases                                          |
| Z49   | Person encountering health services for dialysis                 |

#### **Diabetic retinopathy**

|       |                                                                       |
|-------|-----------------------------------------------------------------------|
| E11.3 | Type 2 diabetes mellitus, with ophthalmic complications               |
| E12.3 | Malnutrition-related diabetes mellitus, with ophthalmic complications |
| E13.3 | Other specified diabetes mellitus, with ophthalmic complications      |

|       |                                                              |
|-------|--------------------------------------------------------------|
| E14.3 | Unspecified diabetes mellitus, with ophthalmic complications |
| H28.0 | Diabetic cataract                                            |
| H36.0 | Diabetic retinopathy                                         |

#### **Coronary heart disease**

|        |                                                                                  |
|--------|----------------------------------------------------------------------------------|
| I20.0  | Unstable angina                                                                  |
| I20.1  | Angina pectoris with documented spasm                                            |
| I20.8  | Other forms of angina pectoris                                                   |
| I20.9  | Angina pectoris, unspecified                                                     |
| I21    | Acute myocardial infarction                                                      |
| I22    | Subsequent myocardial infarction                                                 |
| I23    | Current complication of acute myocardial infarction                              |
| I24    | Other acute ischemic heart diseases                                              |
| I25    | Coronary atherosclerosis                                                         |
| I50    | Heart failure                                                                    |
| I98.8  | Other specified disorders of circulatory system in diseases classified elsewhere |
| M6551* | Percutaneous transluminal coronary angioplasty                                   |
| M6552* | Percutaneous transluminal coronary angioplasty                                   |
| M6561* | Percutaneous transcatheter placement of intracoronary stent                      |
| M6562* | Percutaneous transcatheter placement of intracoronary stent                      |
| M6563* | Percutaneous transcatheter placement of intracoronary stent                      |
| M6564* | Percutaneous transcatheter placement of intracoronary stent                      |
| M6571* | Percutaneous transluminal coronary atherectomy                                   |
| M6572* | Percutaneous transluminal coronary atherectomy                                   |
| M6633* | Percutaneous mechanical thrombolysis                                             |
| M6634* | Percutaneous thrombolytic treatment, coronary artery                             |
| M6620* | Percutaneous intravascular atherectomy                                           |
| O1641* | Vascular bypass operation, aorta-coronary                                        |
| O1642* | Vascular bypass operation, aorta-coronary                                        |



|        |                                           |
|--------|-------------------------------------------|
| O1647* | Vascular bypass operation, aorta-coronary |
| OA641* | Vascular bypass operation, aorta-coronary |
| OA642* | Vascular bypass operation, aorta-coronary |
| OA647* | Vascular bypass operation, aorta-coronary |

#### **Cerebrovascular disease**

|        |                                                                                      |
|--------|--------------------------------------------------------------------------------------|
| I60    | Cerebrovascular diseases                                                             |
| I61    | Intracerebral hemorrhage                                                             |
| I62    | Other nontraumatic intracranial hemorrhage                                           |
| I63    | Cerebral infarction                                                                  |
| I64    | Stroke, not specified as hemorrhage or infarction                                    |
| I65    | Occlusion and stenosis of precerebral arteries, not resulting in cerebral infarction |
| I66    | Occlusion and stenosis of cerebral arteries, not resulting in cerebral infarction    |
| I67    | Other cerebrovascular diseases                                                       |
| I68    | Cerebrovascular disorders in diseases classified elsewhere                           |
| G45    | Transient cerebral ischemic attacks and related syndromes                            |
| G46.8  | Other vascular syndromes of brain in cerebrovascular diseases                        |
| M6631* | Percutaneous thrombus removal, cerebral                                              |
| M6593* | Percutaneous transluminal angioplasty, cerebral and carotid                          |
| M6594* | Percutaneous transluminal angioplasty, cerebral and carotid                          |
| M6599* | Percutaneous cerebral angioplasty with drug                                          |
| M6601* | Percutaneous intravascular installation of metallic stent cerebral and carotid       |
| M6602* | Percutaneous intravascular installation of metallic stent cerebral and carotid       |

#### **Peripheral arterial disease**

|       |                                                                        |
|-------|------------------------------------------------------------------------|
| E11.5 | Type 2 diabetes mellitus, with circulatory complications               |
| E12.5 | Malnutrition-related diabetes mellitus, with circulatory complications |
| E13.5 | Other specified diabetes mellitus, with circulatory complications      |
| E14.5 | Unspecified diabetes mellitus, with circulatory complications          |
| I70.2 | Atherosclerosis of arteries of extremities                             |

|        |                                                                               |
|--------|-------------------------------------------------------------------------------|
| I70.3  | Unspecified Atherosclerosis of unspec. type of bypass graft(s) of extremities |
| I70.9  | Generalized and unspecified atherosclerosis                                   |
| I73.1  | Thromboangiitis obliterans                                                    |
| I73.8  | Other specified peripheral vascular diseases                                  |
| I73.9  | Peripheral vascular disease, unspecified                                      |
| I77.9  | Disorder of arteries and arterioles, unspecified                              |
| I79.2  | Diabetic peripheral angiopathy                                                |
| M6597* | Percutaneous transluminal angioplasty                                         |
| M6605* | Percutaneous intravascular installation of metallic stent                     |
| M6613* | Percutaneous intravascular installation of stent-graft                        |
| M6632* | Percutaneous thrombus removal                                                 |
| M6620* | Percutaneous intravascular atherectomy                                        |
| O1643* | Vascular bypass operation, artery, others                                     |
| O1644* | Vascular bypass operation, artery, others                                     |
| O0161* | Vascular bypass operation, artery, others                                     |
| O0171* | Vascular bypass operation, artery, others                                     |
| O1645* | Vascular bypass operation, artery, others                                     |
| O1646* | Vascular bypass operation, artery, others                                     |

---

\* Procedure code.

**Supplementary Table S4. ICD-10 code for Charlson comorbidity index which was modified to avoid the duplication of target disease and outcomes**

| <b>Comorbidity</b>               | <b>ICD code</b>                                                                                   |
|----------------------------------|---------------------------------------------------------------------------------------------------|
| Dementia                         | F00-F03, F05.1, G30, G31.1                                                                        |
| Chronic pulmonary disease        | I27.8, I27.9, J40-J47, J60-J67, J68.4, J70.1, J70.3                                               |
| Rheumatic disease                | M05, M06, M31.5, M32-M34, M35.1, M35.3, M36                                                       |
| Peptic ulcer disease             | K25-K28                                                                                           |
| Mild liver disease               | B18, K70.0-K70.3, K70.9, K71.3-K71.5, K71.7, K73, K74, K76.0,<br>K76.2-K76.4, K76.8, K76.9, Z94.4 |
| Moderate or severe liver disease | I85.0, I85.9, I86.4, I98.2, K70.4, I71.1, K72.1, K72.9, K76.5,<br>K76.6, K76.7                    |
| Alcohol-related disease          | K70.2, K70.30-K70.43                                                                              |
| AIDS/HIV*                        | B20-B22, B24                                                                                      |

\*AIDS/HIV=Acquired Immune Deficiency Syndrome/Human Immunodeficiency Virus

**Supplementary Table S5. Hazard ratios of insulin use in DEP**

|                       | Type 2 diabetes  | DEP              | <i>p</i> value |
|-----------------------|------------------|------------------|----------------|
| <b>1 YEAR</b>         |                  |                  |                |
| Total patient number  | 153,894          | 3,629            |                |
| Number of insulin use | 16,551           | 646              |                |
| Crude HR [95% CI]     | 1.00 (Reference) | 1.71 [1.58–1.85] | <0.0001        |
| Model 1 HR [95% CI]   | 1.00 (Reference) | 1.50 [1.38–1.62] | <0.0001        |
| Model 2 HR [95% CI]   | 1.00 (Reference) | 1.39 [1.29–1.51] | <0.0001        |
| <b>5 YEAR</b>         |                  |                  |                |
| Total patient number  | 153,894          | 3,629            |                |
| Number of insulin use | 29,764           | 1,175            |                |
| Crude HR [95% CI]     | 1.00 (Reference) | 1.63 [1.54–1.73] | <0.0001        |
| Model 1 HR [95% CI]   | 1.00 (Reference) | 1.47 [1.39–1.56] | <0.0001        |
| Model 2 HR [95% CI]   | 1.00 (Reference) | 1.38 [1.30–1.47] | <0.0001        |

Hazard ratios of insulin use within 1 and 5 years after a diagnosis of DEP was compared to type 2 diabetes by Cox proportional hazard models. Multivariate hazard ratios of model 1 were adjusted for sex, age, BMI, FPG, LDL-cholesterol, alcohol consumption, smoking status, and medical coverage. Multivariate hazard ratios of model 2 were adjusted for sex, age, BMI, FPG, LDL-cholesterol, alcohol consumption, smoking status, medical coverage (same as model 1), systolic BP, triglyceride, eGFR, and CCI.

DEP=diabetes following pancreatic disease. Type 2 diabetes=diabetes without prior pancreatic disease. HR=hazard ratio. CI=Confidence interval. BMI=body mass index. FBG=fasting blood glucose. LDL=low-density lipoprotein. BP=blood pressure. eGFR=estimated glomerular filtration rate. CCI=Charlson comorbidity index.

**Supplementary Table S6. Baseline characteristics of DEP subtypes**

|                                        | PPDM-A<br>(n=1,029) | PPDM-C<br>(n=2,264) | PCRD<br>(n=328) | CFRD<br>(n=8) |
|----------------------------------------|---------------------|---------------------|-----------------|---------------|
| Male sex                               | 690 (67.1%)         | 1,395 (61.6%)       | 175 (53.4%)     | 8 (100.0%)    |
| Age, years                             | 60.3 (11.9)         | 60.7 (11.7)         | 63.8 (11.1)     | 61.1 (11.9)   |
| Medical aid                            | 48 (4.7%)           | 70 (3.1%)           | 10 (3.0%)       | 0 (0.0%)      |
| CCI                                    | 1.2 (1.0)           | 1.3 (1.1)           | 1.4 (1.1)       | 1.4 (1.1)     |
| BMI, kg/m2                             | 24.9 (3.5)          | 24.8 (3.6)          | 24.4 (3.3)      | 24.4 (3.0)    |
| Waist circumference, cm                | 85.7 (8.6)          | 85.0 (8.9)          | 83.8 (8.9)      | 83.5 (5.7)    |
| Systolic BP, mmHg                      | 127.8 (15.4)        | 128.1 (16.0)        | 128.7 (15.6)    | 134.4 (10.5)  |
| Diastolic BP, mmHg                     | 79.0 (10.4)         | 79.1 (10.6)         | 77.9 (9.3)      | 83.1 (5.9)    |
| FPG, mg/dL                             | 128.8 (47.1)        | 124.6 (40.7)        | 119.3 (35.1)    | 122.3 (11.2)  |
| Total cholesterol, mg/dL               | 200.9 (48.3)        | 199.4 (44.2)        | 197.1 (42.8)    | 230.4 (61.6)  |
| Triglyceride, mg/dL                    | 201.9 (210.5)       | 178.3 (161.6)       | 164.7 (124.5)   | 180.5 (87.3)  |
| HDL-cholesterol, mg/dL                 | 51.2 (24.1)         | 51.5 (17.2)         | 52.0 (15.1)     | 47.9 (9.3)    |
| LDL-cholesterol, mg/dL                 | 112.3 (39.3)        | 113.8 (40.7)        | 113.4 (36.5)    | 146.1 (61.4)  |
| Serum Cr, mg/dL                        | 1.0 (0.8)           | 1.0 (0.8)           | 0.9 (0.2)       | 1.1 (0.2)     |
| eGFR, mL/min/1.73m2*                   | 82.9 (20.1)         | 83.1 (19.3)         | 80.9 (16.6)     | 75.3 (14.4)   |
| Alcohol consumption (Any) <sup>†</sup> | 455 (44.2%)         | 903 (39.9%)         | 121 (36.9%)     | 3 (37.5%)     |
| Smoking status (Any) <sup>‡</sup>      | 528 (51.3%)         | 1,039 (45.9%)       | 120 (36.6%)     | 6 (75.0%)     |

Data are mean (SD) or n (%). Percentage might not add up to 100% due to rounding. DEP=diabetes following pancreatic disease. PPDM-A=post-acute pancreatitis diabetes mellitus. PPDM-C=post-chronic pancreatitis diabetes mellitus. PCRD=pancreatic cancer-related diabetes. CFRD=cystic fibrosis-related diabetes. CCI=Charlson comorbidity index. BMI=body mass index. BP=blood pressure. FPG=fasting plasma glucose. HDL=high-density lipoprotein. LDL=low-density lipoprotein. Cr=creatinine. eGFR=estimated glomerular filtration rate.

\*eGFR was calculated using CKD-EPI (Chronic Kidney Disease Epidemiology Collaboration) equation; eGFR =  $141 \times \min(\text{SCr}/\kappa, 1)^\alpha \times \max(\text{SCr}/\kappa, 1)^{-1.209} \times 0.993^{\text{Age}} \times 1.018 [\text{if female}] \times 1.159 [\text{if Black}]$ . SCr is serum creatinine,

$\kappa$  is 0.7 for females and 0.9 for males,  $\alpha$  is -0.329 for females and -0.411 for males, min indicates the minimum of  $SCr/\kappa$  or 1, and max indicates the maximum of  $SCr/\kappa$  or 1.

<sup>†</sup>Former and current smokers are included.

<sup>‡</sup>Any amount of alcohol consumption are included.

**Supplementary Table S7. Relative odds for diabetic complications and all-cause mortality by DEP subtypes compared to type 2 diabetes.**

|                                       | <b>PPDM-A</b>    | <i>p</i> value | <b>PPDM-C</b>    | <i>p</i> value | <b>PCRD</b>      | <i>p</i> value | <b>CFRD</b>       | <i>p</i> value |
|---------------------------------------|------------------|----------------|------------------|----------------|------------------|----------------|-------------------|----------------|
| <b>Acute diabetic complications</b>   |                  |                |                  |                |                  |                |                   |                |
| Hypoglycemia                          | 1.86 [1.34–2.59] | 0.0002         | 1.91 [1.53–2.38] | <0.0001        | 1.48 [0.81–2.72] | 0.2027         | 0.00              | N/A            |
| Hyperosmolar hyperglycemic state      | 1.22 [0.65–2.28] | 0.5332         | 1.26 [0.83–1.92] | 0.2710         | 2.25 [1.00–5.07] | 0.0497         | 0.00              | N/A            |
| Diabetic ketoacidosis                 | 0.91 [0.29–2.84] | 0.8692         | 1.43 [0.76–2.69] | 0.2667         | 3.09 [0.98–9.70] | 0.0537         | 0.00              | N/A            |
| <b>Chronic diabetic complications</b> |                  |                |                  |                |                  |                |                   |                |
| Diabetic neuropathy                   | 1.22 [1.06–1.41] | 0.0070         | 1.52 [1.39–1.67] | <0.0001        | 0.99 [0.76–1.30] | 0.9542         | 1.43 [0.29–7.14]  | 0.6603         |
| Diabetic nephropathy                  | 1.33 [1.14–1.55] | 0.0003         | 1.37 [1.24–1.52] | <0.0001        | 1.59 [1.23–2.06] | 0.0004         | 2.67 [0.63–11.25] | 0.1811         |
| Diabetic retinopathy                  | 1.02 [0.87–1.20] | 0.8361         | 1.15 [1.03–1.27] | 0.0120         | 1.00 [0.75–1.34] | 0.9998         | 1.70 [0.34–8.45]  | 0.5161         |
| Coronary heart disease                | 1.49 [1.30–1.70] | <0.0001        | 1.67 [1.53–1.83] | <0.0001        | 1.41 [1.12–1.78] | 0.0033         | 0.29 [0.04–2.39]  | 0.2491         |
| Cerebrovascular disease               | 1.36 [1.18–1.57] | <0.0001        | 1.39 [1.26–1.53] | <0.0001        | 1.40 [1.10–1.77] | 0.0068         | 1.94 [0.44–8.62]  | 0.3823         |
| Peripheral arterial disease           | 1.31 [1.15–1.48] | <0.0001        | 1.39 [1.28–1.52] | <0.0001        | 1.09 [0.87–1.36] | 0.4733         | 2.39 [0.56–10.22] | 0.2389         |
| <b>All-cause mortality</b>            | 1.77 [1.46–2.14] | <0.0001        | 1.47 [1.29–1.69] | <0.0001        | 3.85 [2.93–5.05] | <0.0001        | 1.31 [0.15–11.83] | 0.8102         |

A logistic regression model was used to analyze the relative odds and their 95% confidence intervals for diabetic complications and all-cause mortality according to each pancreatic disease in the DEP group. Odds ratios were adjusted for sex, age, BMI, FPG, LDL-cholesterol, alcohol consumption, smoking status, medical coverage, systolic BP, triglyceride, eGFR, and CCI as previously defined as Model 2 OR. Diabetes without prior pancreatic disease described as type 2 diabetes was used as a reference group. N/A indicates insufficient number of events to estimates odds of the outcome.

Type 2 diabetes=diabetes without prior pancreatic disease. PPDM-A=post-acute pancreatitis diabetes mellitus. PPDM-C=post-chronic pancreatitis diabetes mellitus. PCRD=pancreatic cancer-related diabetes. CFRD=cystic fibrosis-related diabetes. OR=Odds ratio. BMI=body mass index. N/A=not available. FPG=fasting plasma glucose. LDL=low-density lipoprotein. BP=blood pressure. eGFR=estimated glomerular filtration rate. CCI=Charlson comorbidity index.



**Supplementary Table S8. Relative odds for all-cause mortality in DEP compared to cardiovascular (CV) or renal disease-matched type 2 diabetes.**

|            | Type 2 diabetes with CV disease    | DEP with CV disease    | 95% CI    | <i>p</i> value |
|------------|------------------------------------|------------------------|-----------|----------------|
| Crude OR   | 1.00                               | 2.05                   | 1.72–2.46 | <0.0001        |
| Model 1 OR | 1.00                               | 1.71                   | 1.40–2.08 | <0.0001        |
| Model 2 OR | 1.00                               | 1.52                   | 1.25–1.87 | <0.0001        |
|            | Type 2 diabetes with renal disease | DEP with renal disease | 95% CI    | <i>p</i> value |
| Crude OR   | 1.00                               | 2.01                   | 1.25–3.25 | 0.0041         |
| Model 1 OR | 1.00                               | 1.74                   | 1.01–3.03 | 0.0481         |
| Model 2 OR | 1.00                               | 1.84                   | 1.05–3.22 | 0.0320         |

Relative odds for all-cause mortality was analyzed using logistic regression models after specific disease-matched in DEP and type 2 diabetes. Type 2 diabetes was used as a reference group. Model 1 OR is the odds ratio adjusted for sex, age, BMI, FPG, LDL-cholesterol, alcohol consumption, smoking status, and medical coverage. Model 2 OR is the odds ratio adjusted for sex, age, BMI, FPG, LDL-cholesterol, alcohol consumption, smoking status, medical coverage (same as model 1), systolic BP, triglyceride, eGFR, and CCI.

DEP=diabetes following pancreatic disease. Type 2 diabetes=diabetes without prior pancreatic disease. OR=Odds ratio. CI=Confidence interval. BMI=body mass index. FPG=fasting plasma glucose. LDL=low-density lipoprotein. BP=blood pressure. eGFR=estimated glomerular filtration rate. CCI=Charlson comorbidity index.

**Supplementary Table S9. Sensitivity analysis for diabetic complications and all-cause mortality among insulin first users in DEP compared to type 2 diabetes.**

|                                       | OR   | 95% CI    | <i>p</i> value |
|---------------------------------------|------|-----------|----------------|
| <b>Acute diabetic complications</b>   |      |           |                |
| Hypoglycemia                          | 1.82 | 1.50–2.20 | <0.0001        |
| Hyperosmolar hyperglycemic state      | 1.34 | 0.96–1.87 | 0.0901         |
| Diabetic ketoacidosis                 | 1.46 | 0.87–2.47 | 0.1522         |
| <b>Chronic diabetic complications</b> |      |           |                |
| Diabetic neuropathy                   | 1.38 | 1.28–1.49 | <0.0001        |
| Diabetic nephropathy                  | 1.37 | 1.26–1.49 | <0.0001        |
| Diabetic retinopathy                  | 1.11 | 1.02–1.21 | 0.0224         |
| Coronary heart disease                | 1.60 | 1.48–1.72 | <0.0001        |
| Cerebrovascular disease               | 1.38 | 1.28–1.50 | <0.0001        |
| Peripheral arterial disease           | 1.35 | 1.26–1.45 | <0.0001        |
| <b>All-cause mortality</b>            | 1.81 | 1.62–2.02 | <0.0001        |

We performed a sensitivity analysis using a logistic regression model for diabetic complications and all-cause mortality in patients new to insulin among antidiabetic drug-naïve patients in the DEP group. Diabetes without prior pancreatic disease described as type 2 diabetes was used as a reference group. Odds ratios were adjusted for sex, age, BMI, FPG, LDL-cholesterol, alcohol consumption, smoking status, medical coverage, systolic BP, triglyceride, eGFR, and CCI as previously defined as Model 2 OR.

DEP=diabetes following pancreatic disease. Type 2 diabetes=diabetes without prior pancreatic disease. OR=Odds ratio. CI=Confidence interval. BMI=body mass index. FPG=fasting plasma glucose. LDL=low-density lipoprotein. BP=blood pressure. eGFR=estimated glomerular filtration rate. CCI=Charlson comorbidity index.

**Supplementary Figure S1. Flowchart of patient selection**

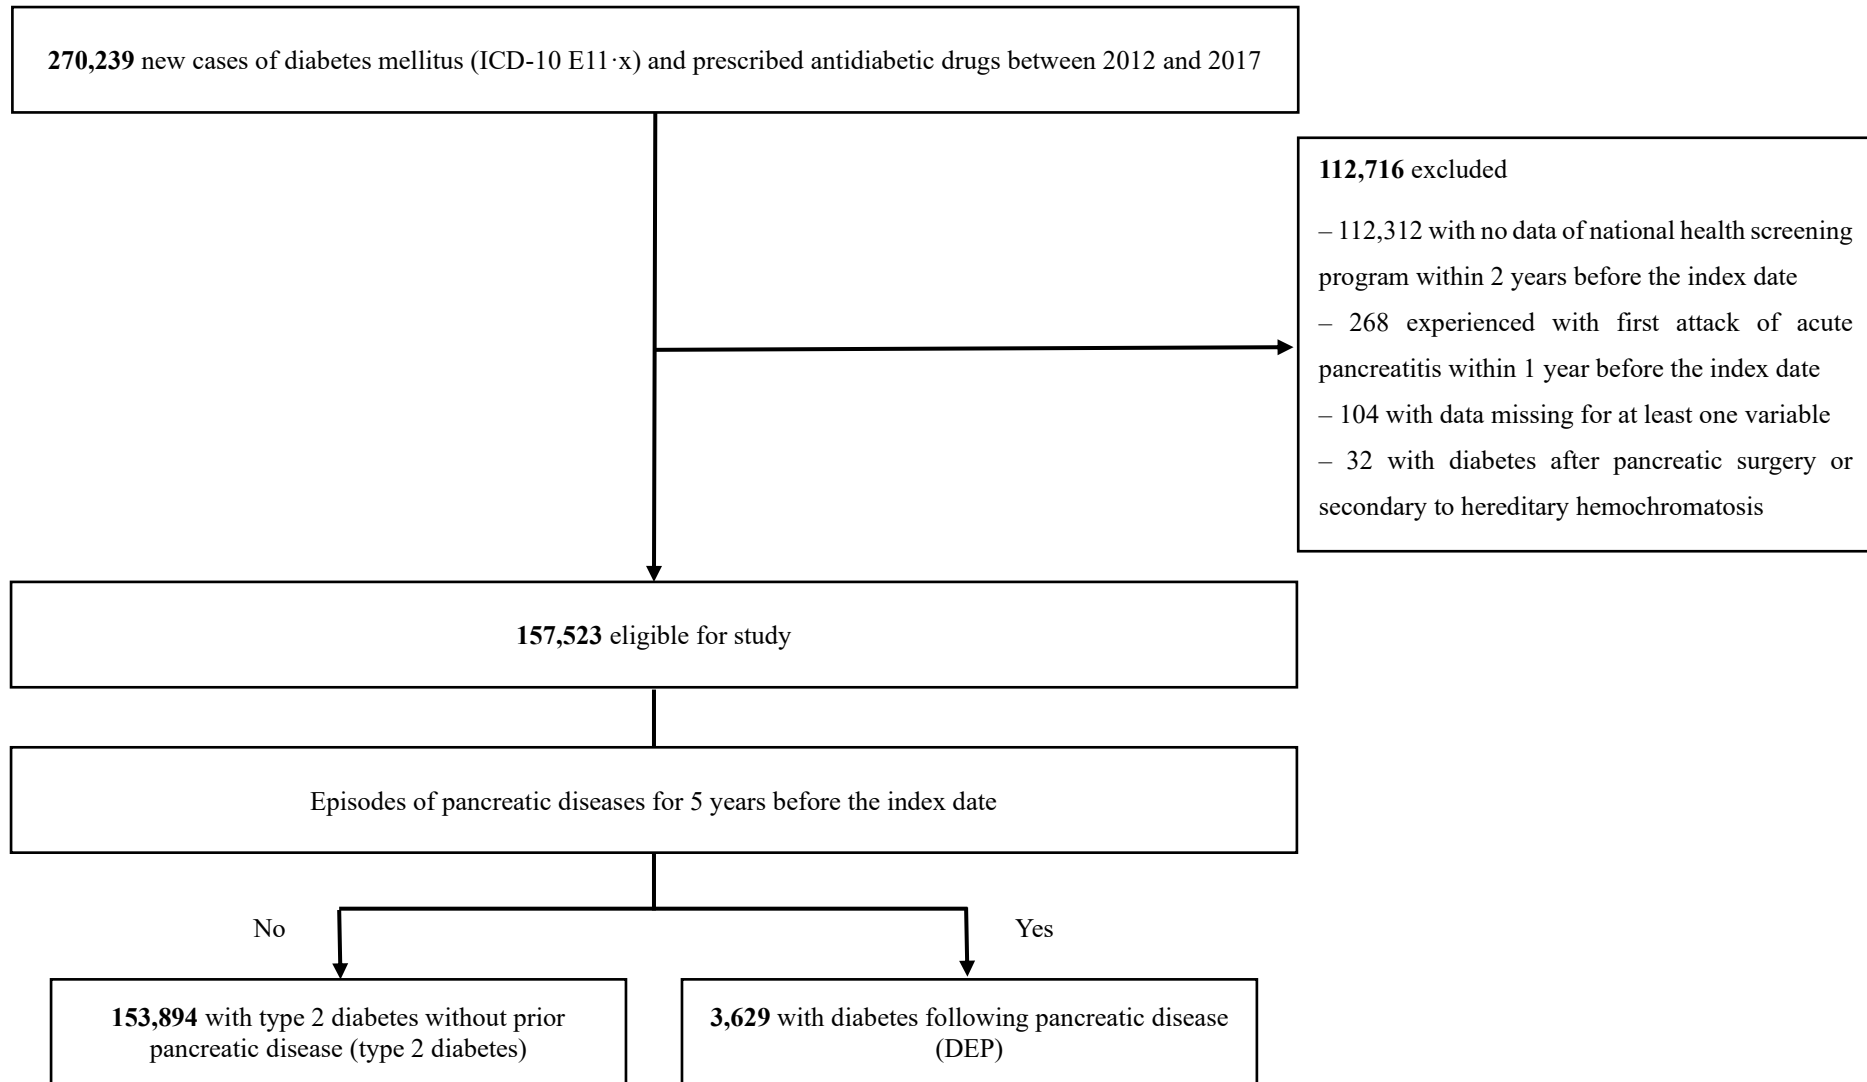

**Supplementary Figure S2. Sensitivity analysis for insulin use at each time point between DEP and type 2 diabetes excluding patients who initiated insulin within 6 months since diagnosis of diabetes**

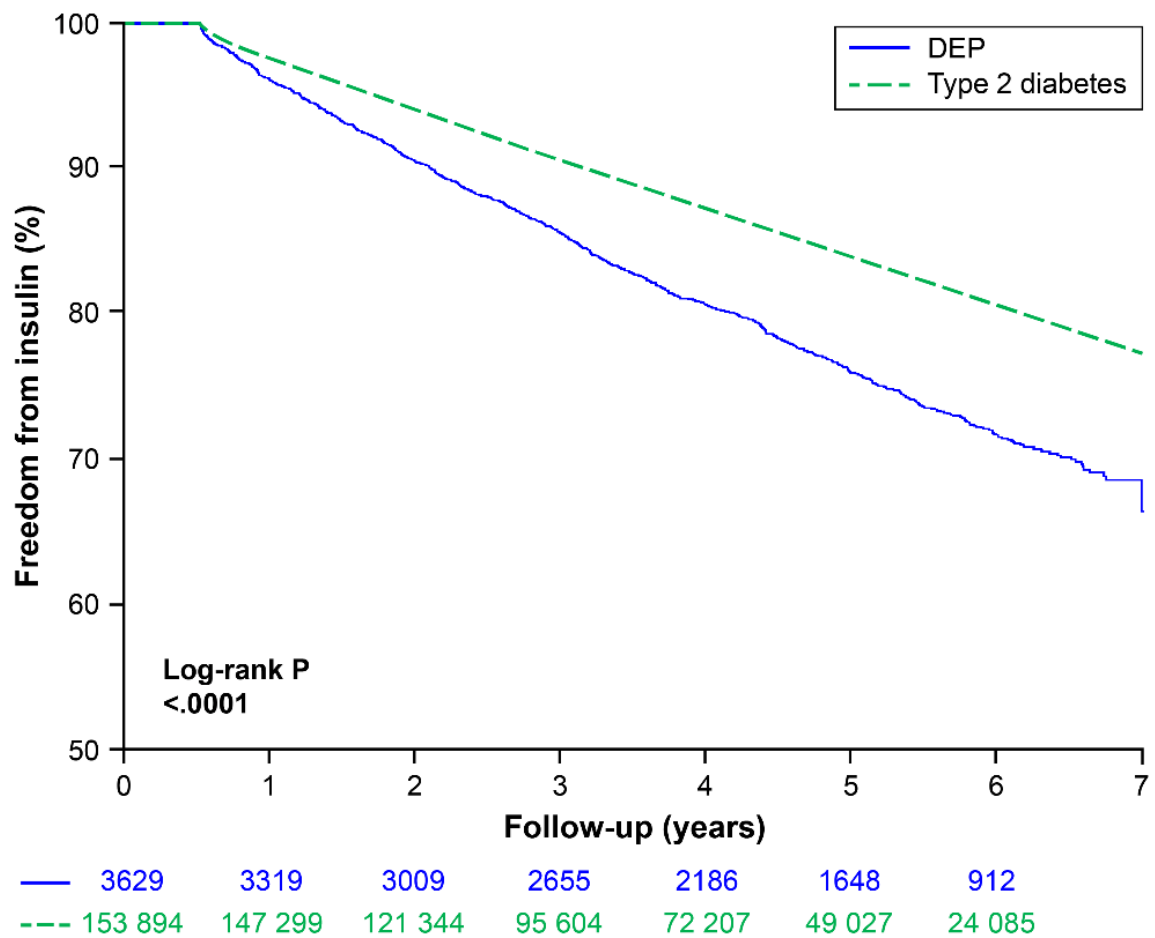

We performed a sensitivity analysis for the cumulative insulin use by eliminating the number of patients who had started insulin within 6 months since diagnosis of diabetes. We nullified insulin use for first 6-month period after the index date to exclude transient insulin use for acute hyperglycemia in patients with first diagnosis of diabetes. Therefore insulin use for the first 6 months had a value of zero on the y-axis, resulting in a horizontal line with slope of zero. And if subjects continue to use insulin even after 6 months from the index date, it was recognized as true insulin use. The table is the number of patients at risk over time ( $p < 0.0001$  by log-rank test). DEP=diabetes following pancreatic disease. Type 2 diabetes=diabetes without prior pancreatic disease.

**Supplementary Figure S3. Subgroup analysis of ORs for diabetic complications and all-cause mortality of DEP compared to type 2 diabetes by insulin regimen**

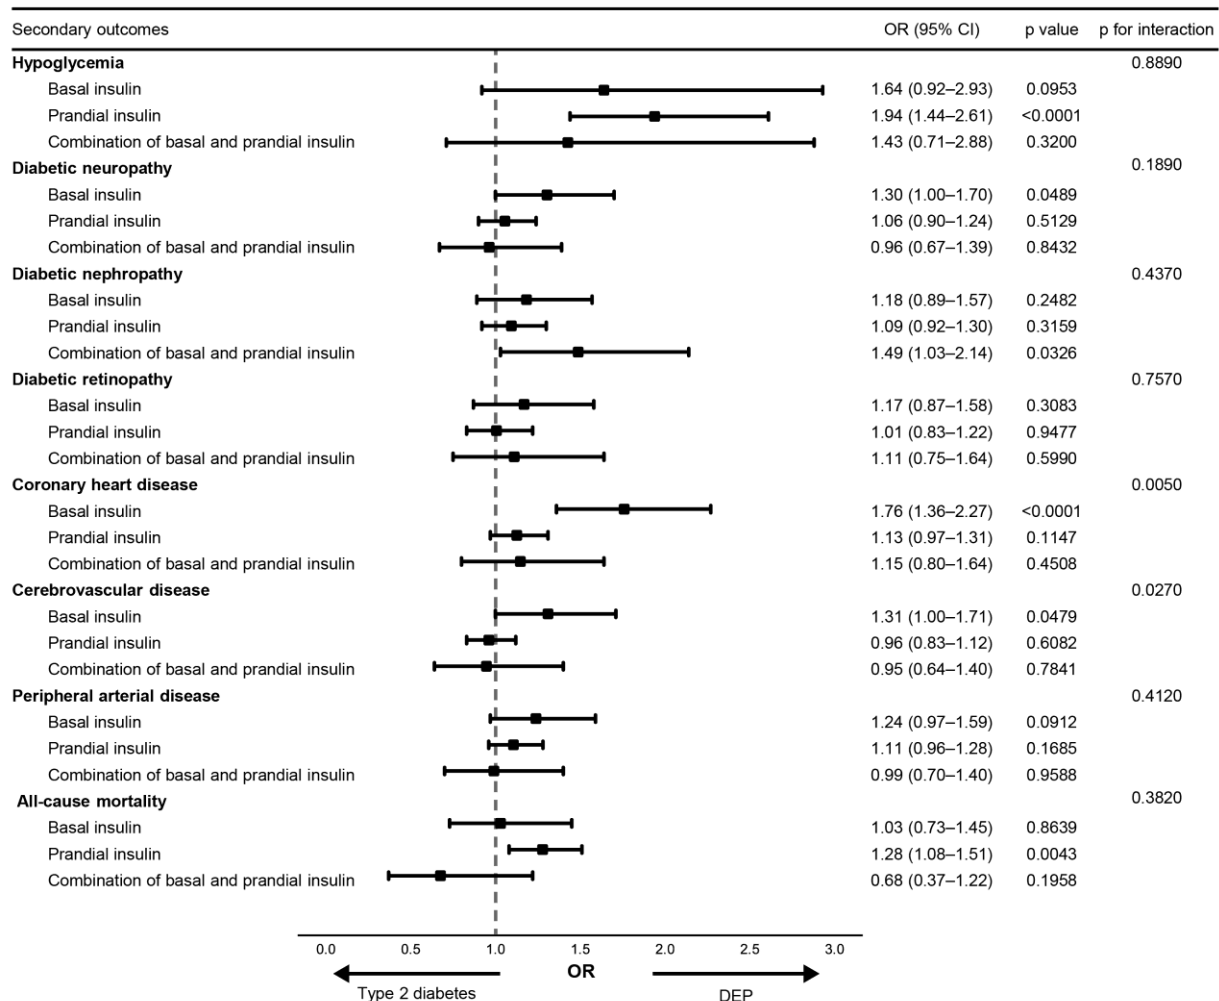

Forest plots of the odds ratios and 95% confidence intervals for diabetic complications and all-cause mortality according to insulin regimen were analyzed by logistic regression models. Each insulin regimen consisted of basal insulin (intermediate, long acting insulin) alone, prandial insulin (short, rapid acting insulin) alone, and combination of basal and prandial insulin. Diabetes without prior pancreatic disease described as type 2 diabetes was used as a reference group. OR is the odds ratio adjusted for sex, age, BMI, FPG, LDL-cholesterol, alcohol consumption, smoking status, medical coverage, systolic BP, triglyceride, eGFR, and CCI.

DEP=diabetes following pancreatic disease. Type 2 diabetes=diabetes without prior pancreatic disease. OR=Odds ratio. CI=Confidence interval. BMI=body mass index. FPG=fasting plasma glucose. LDL=low-density lipoprotein. BP=blood pressure. eGFR=estimated glomerular filtration rate. CCI=Charlson comorbidity index.
